# Supplementary material for: Preparation of UV-curable functionalized phosphazene-containing nanotube/polyurethane acrylate nanocomposite coatings with enhanced thermal and mechanical properties
Source: Royal Society of Chemistry journal article supplement (doi:10.1039/c5ra12264c), 2015-01-01

**Electronic Supplementary Material (ESI) for RSC Advances.**

**Preparation of UV-Curable Functionalized Phosphazene-containing  
Nanotubes/Polyurethane Acrylate Nanocomposite Coatings with  
Enhanced Thermal and Mechanical Properties**

Shuilai Qiu <sup>a</sup>, Siyu Li <sup>b</sup>, Youji Tao <sup>c</sup>, Xiaming Feng <sup>a,d</sup>, Bin Yu <sup>a,d</sup>, Xiaowei Mu <sup>a</sup>,  
Weiyi Xing <sup>a,\*</sup>, Yuan Hu <sup>a,d,\*</sup>, Ganxin Jie <sup>c</sup>

<sup>a</sup> *State Key Laboratory of Fire Science, University of Science and Technology of  
China, 96 Jinzhai Road, Hefei, Anhui 230026, P.R. China*

<sup>b</sup> *Department of Polymer Science and Engineering, University of Science and  
Technology of China, 96 Jinzhai Road, Hefei, Anhui 230026, P.R. China*

<sup>c</sup> *State Key Laboratory of Environmental Adaptability for Industrial Products, China  
National Electric Apparatus Research Institute, Guangzhou, Guangdong 510300, P.R.  
China*

<sup>d</sup> *Suzhou Key Laboratory of Urban Public Safety, Suzhou Institute for Advanced Study,  
University of Science and Technology of China, 166 Ren'ai Road, Suzhou, Jiangsu  
215123, P.R. China*

### ***Thermal properties of PUA and f-PZS/PUA nanocomposites***

DSC is performed to investigate the glass transfer process of f-PZS/PUA nanocomposites. Figure S4 plots the DSC curves and provides the glass transition temperature ( $T_g$ ). It can be seen obviously that the  $T_g$  values of the cured films decrease with increasing content of f-PZS nanotubes. When the f-PZS nanotubes content increases from 0.1 wt% to 3 wt%, the  $T_g$  value of PUA nanocomposite film decreases from 12.80 °C to -3.03 °C, which has a similar trend to the  $T_g$  results from the DMA test in the new manuscript (The temperature at the peak of loss factor  $\tan \delta$  curve is defined as the glass transition temperature ( $T_g$ )).

**Figure S1.** TGA curves of PUA and f-PZS/PUA nanocomposites under nitrogen atmosphere. (containing f-PZS/PUA-5.0 sample)

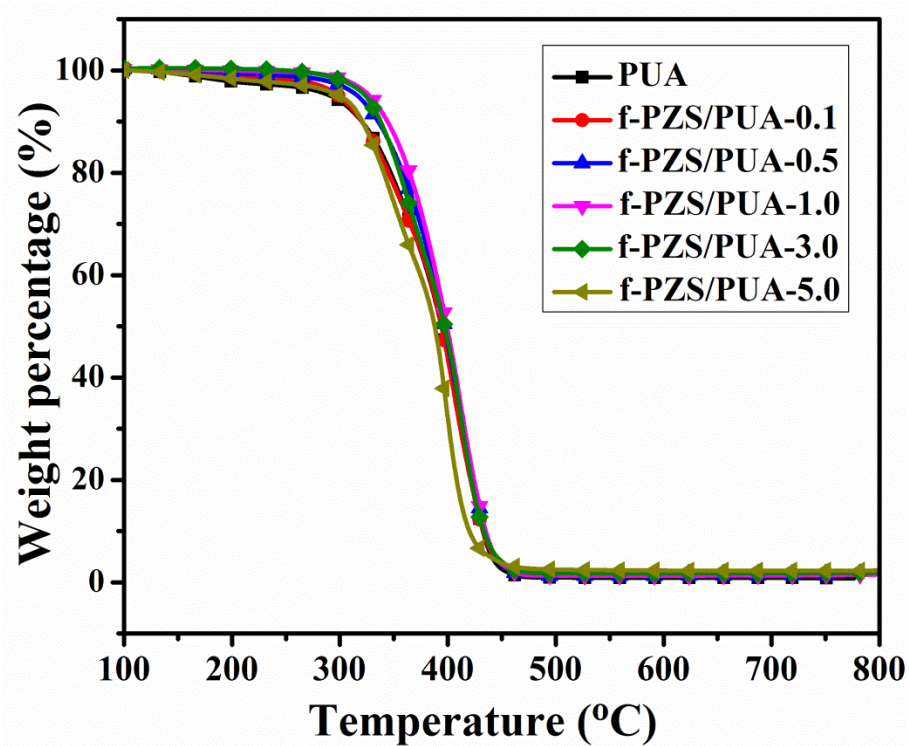

**Figure S2.** Storage modulus ( $E'$ ) curves of PUA and f-PZS/PUA nanocomposites as a function of temperature. (containing f-PZS/PUA-5.0 sample)

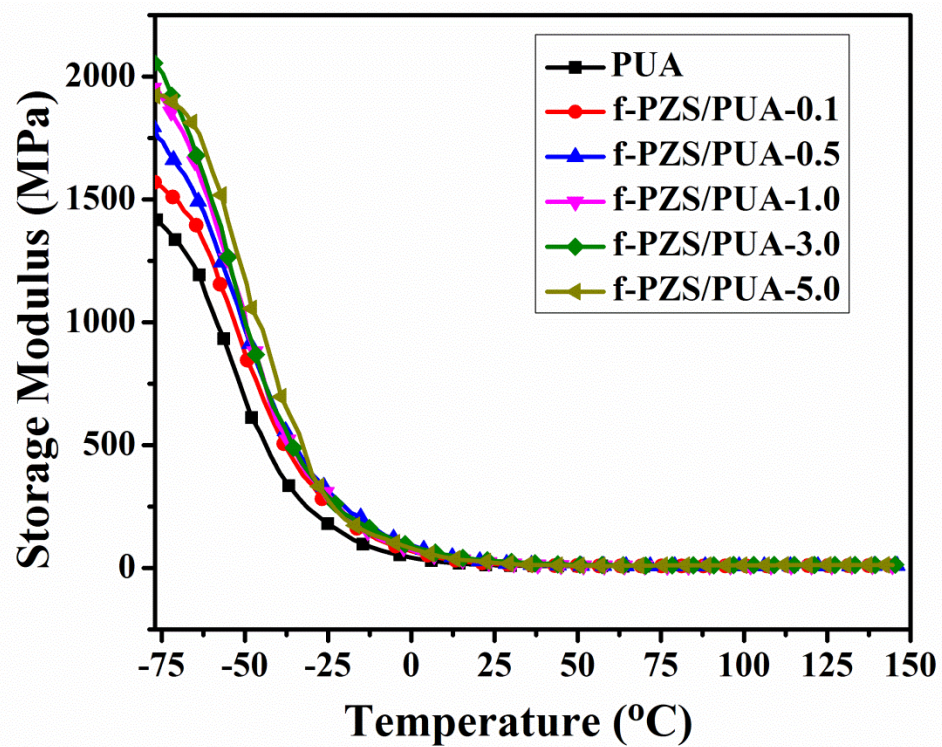

**Figure S3.** UV–Vis spectra of PUA and f-PZS/PUA nanocomposites. (containing f-PZS/PUA-5.0 sample)

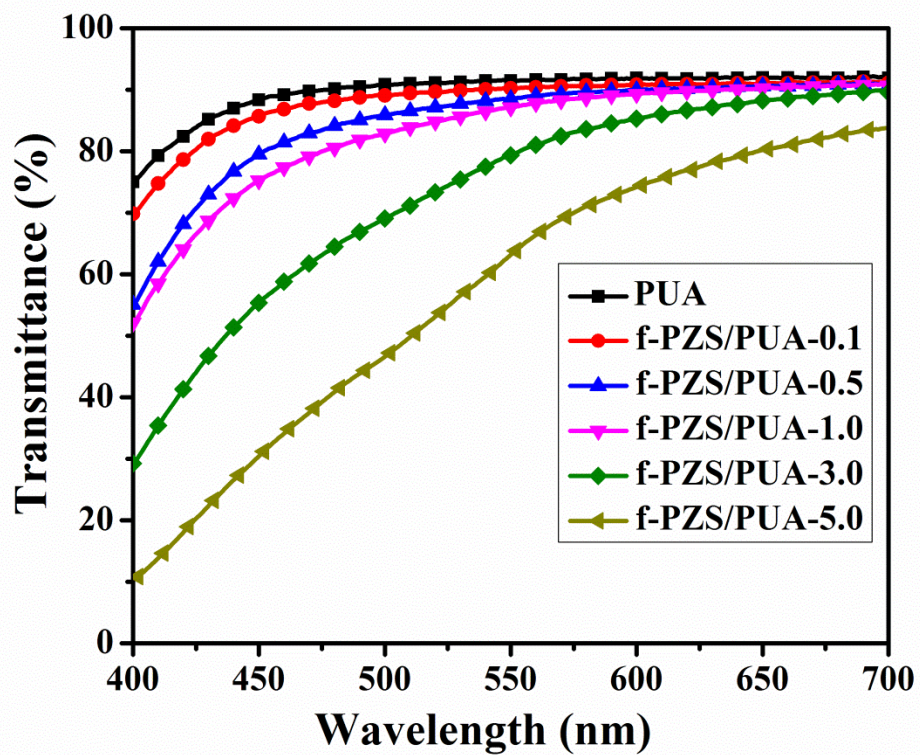

Figure S4. DSC curves of PUA and f-PZS/PUA nanocomposites.

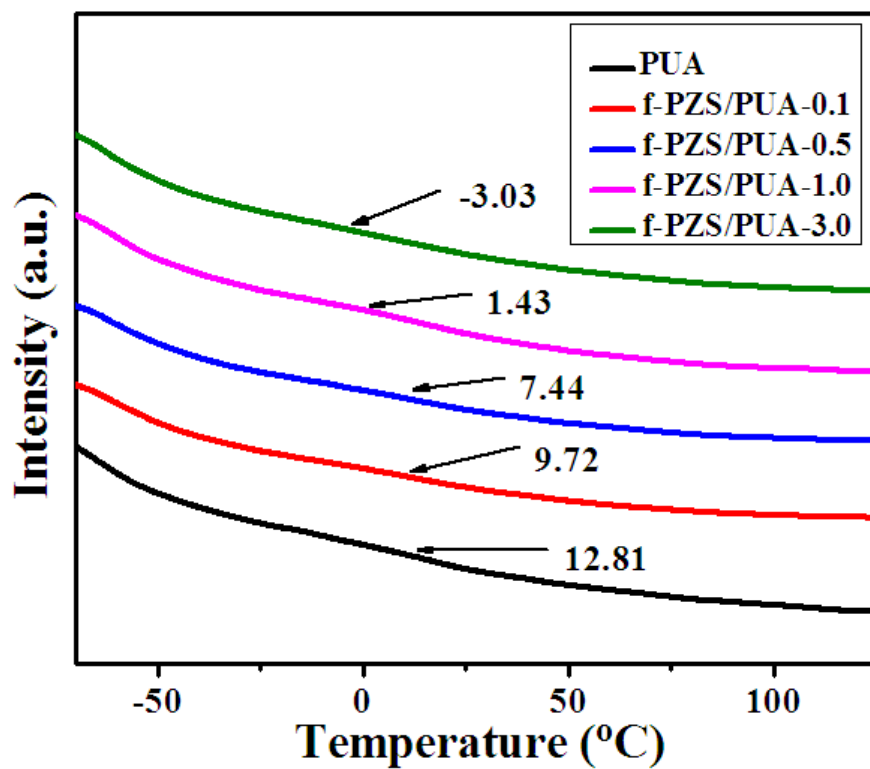

Supplement: c5ra12264c1.pdf [file c5ra12264c1.pdf]
